# Supplementary material for: Sensitivity, advantages, limitations, and clinical utility of targeted next-generation sequencing panels for the diagnosis of selected lysosomal storage disorders
Source: PubMed Central journal article supplement (PMC6687342; doi:10.1590/1678-4685-gmb-2018-0092), 2019-04-11
Supplement: 1415-4757-GMB-1678-4685-GMB-2018-0092-20190318-suppl1.pdf [file 1415-4757-GMB-1678-4685-GMB-2018-0092-20190318-suppl1.pdf]

## Supplementary Material to "Sensitivity, advantages, limitations, and clinical utility of targeted next-generation sequencing panels for the diagnosis of selected lysosomal storage disorders"

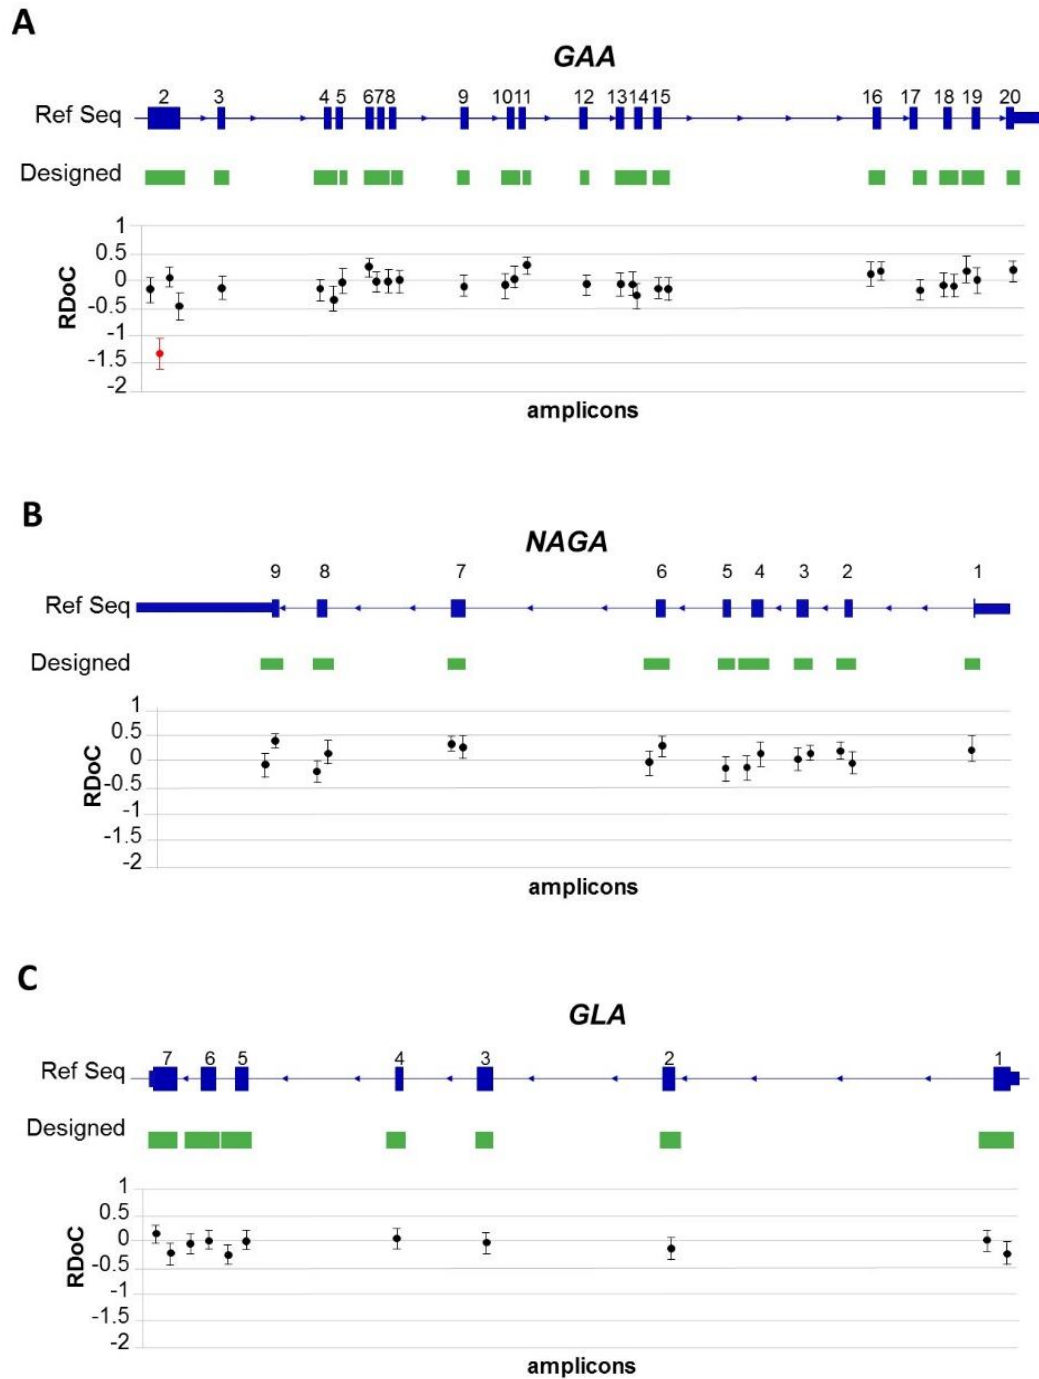

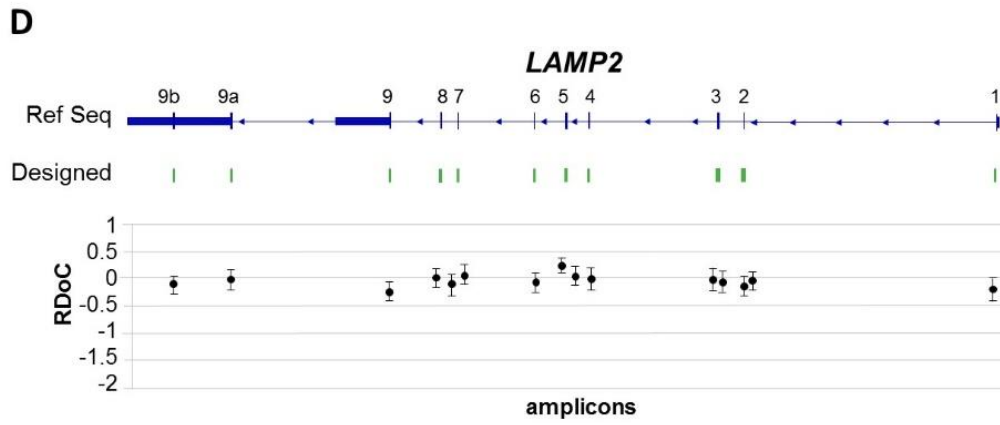

**Figure S1** - Relative Depth of Coverage (RDoC) of 73 custom amplicons corresponding to eight-nine samples analyzed in one run. In blue is represented the reference sequence indicating the coding exons and in green the targets designed for NGS sequencing. A) *GAA*, B) *NAGA*, C) *GLA* and D) *LAMP2*.
