# Supplementary material for: Sensitivity, advantages, limitations, and clinical utility of targeted next-generation sequencing panels for the diagnosis of selected lysosomal storage disorders
Source: PubMed Central journal article supplement (PMC6687342; doi:10.1590/1678-4685-gmb-2018-0092), 2019-04-11
Supplement: 1415-4757-GMB-1678-4685-GMB-2018-0092-20190318-suppl2.pdf [file 1415-4757-GMB-1678-4685-GMB-2018-0092-20190318-suppl2.pdf]

## Supplementary Material to "Sensitivity, advantages, limitations, and clinical utility of targeted next-generation sequencing panels for the diagnosis of selected lysosomal storage disorders"

**A**

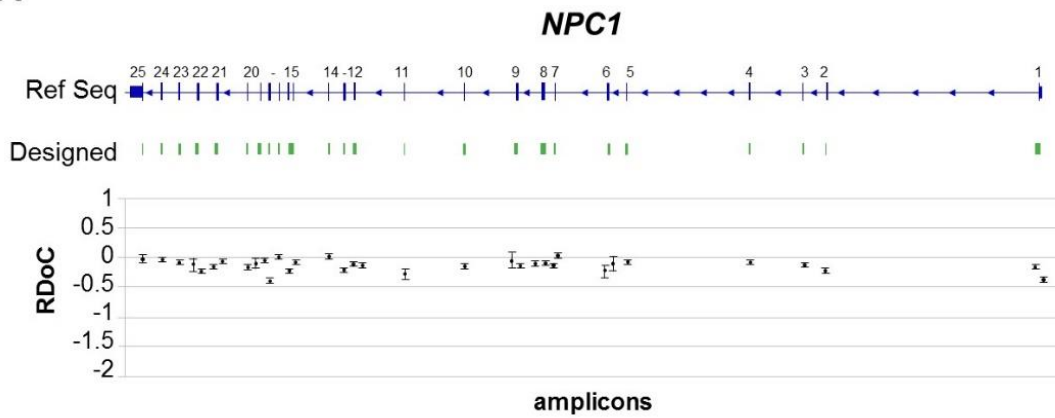

**B**

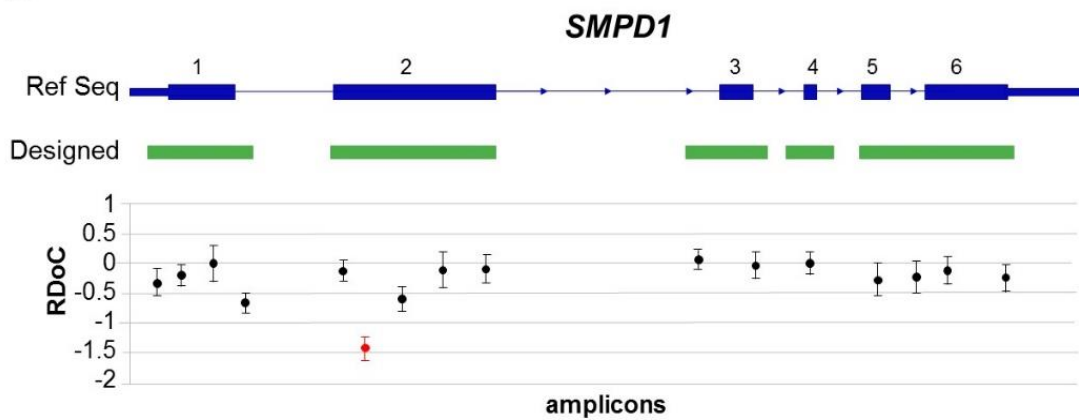

**C**

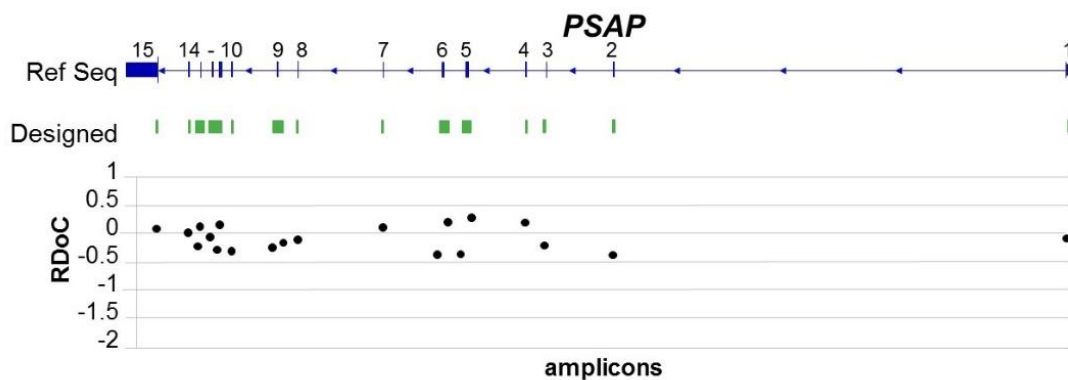

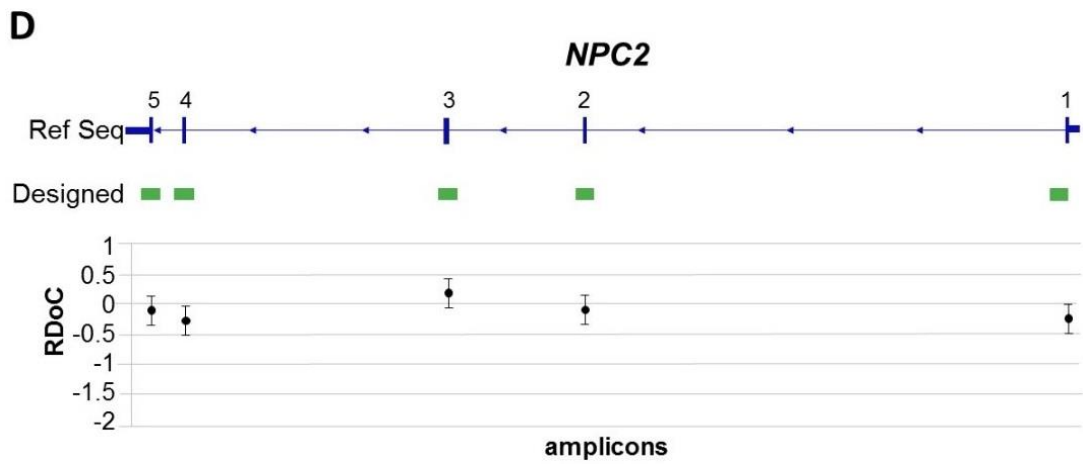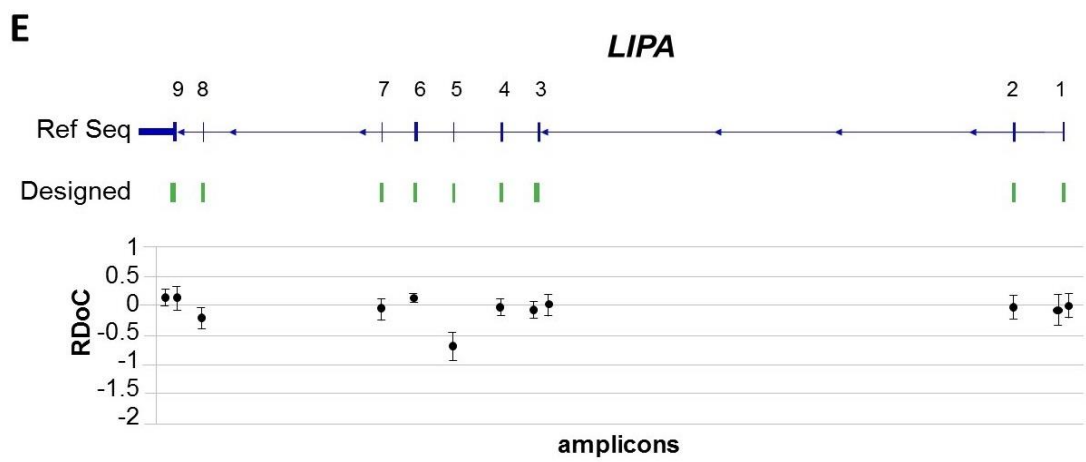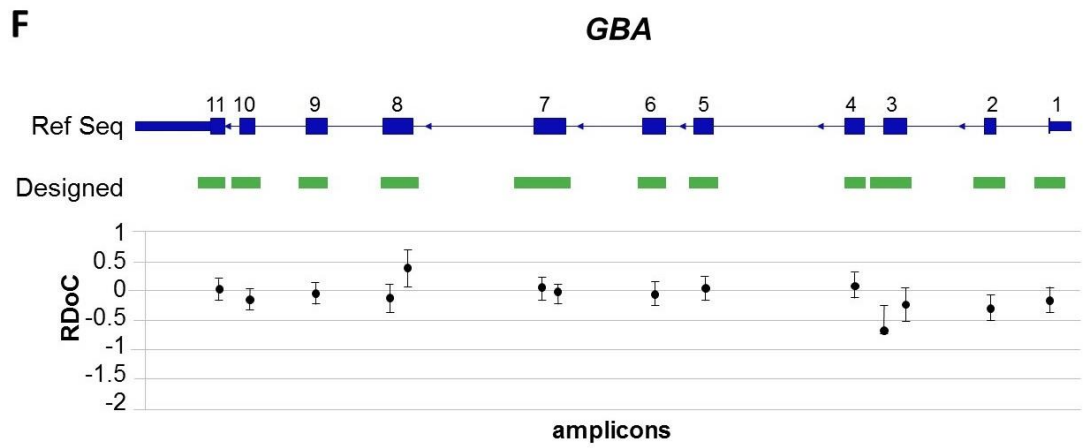

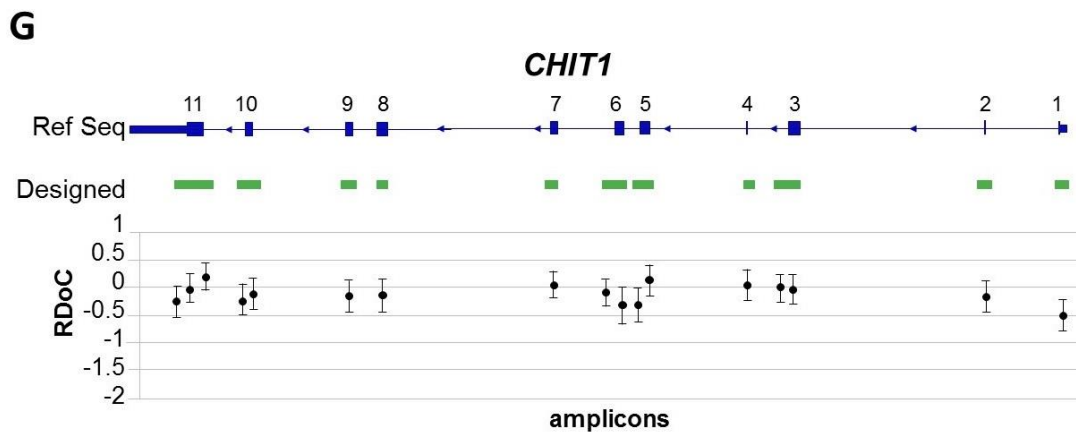

**Figure S2** - Relative Depth of Coverage (RDoC) of 118 custom amplicons corresponding to eight-nine samples analyzed in one run. In blue is represented the reference sequence indicating the coding exons and in green the targets designed for NGS sequencing. A) *NPC1*, B) *SMPD1*, C) *PSAP*, D) *NPC2*, E) *LIPA*, F) *GBA* and G) *CHIT1*.
